# Supplementary material for: Trends in COVID-19 Health Disparities in North Carolina: Preparing the Field for Long-Haul Patients
Source: MDPI journal article supplement (doi:10.3390/healthcare9121704), 2021-12-08
Supplement: s1 [file s1]

**Supplementary Table S1.** COVID-19 distribution for North Carolina Counties ( $n = 100$ )

| County     | Cases of COVID-19<br>per 100,000<br>inhabitants | Deaths per 100,000<br>COVID-19 cases | Median household<br>income (US\$) | Inhabitants in<br>poverty (%) | COVID-19 fully<br>vaccinated per<br>100,000 |
|------------|-------------------------------------------------|--------------------------------------|-----------------------------------|-------------------------------|---------------------------------------------|
| Alamance   | 12185                                           | 176.9                                | 57,963                            | 14.6                          | 54601.8                                     |
| Alexander  | 12705.2                                         | 228.4                                | 54,960                            | 11.7                          | 40867.3                                     |
| Alleghany  | 10238                                           | 45.4                                 | 41,420                            | 16.9                          | 54377.3                                     |
| Anson      | 11195.9                                         | 224.9                                | 40,826                            | 21.4                          | 42649.1                                     |
| Ashe       | 8889.6                                          | 167.5                                | 41,542                            | 14.6                          | 50218.7                                     |
| Avery      | 12647.1                                         | 120                                  | 45,823                            | 16.4                          | 50891.4                                     |
| Beaufort   | 10549.5                                         | 218.4                                | 49,410                            | 17.6                          | 51023.5                                     |
| Bertie     | 9520.1                                          | 232.2                                | 37,899                            | 24.2                          | 50129.3                                     |
| Bladen     | 11967.6                                         | 182.6                                | 42,260                            | 21.2                          | 46436.6                                     |
| Brunswick  | 8111.4                                          | 124.4                                | 63,712                            | 10.2                          | 59493.1                                     |
| Buncombe   | 7592.5                                          | 128.1                                | 55,448                            | 12.2                          | 61323.7                                     |
| Burke      | 11983.1                                         | 182.3                                | 47,890                            | 18.4                          | 43868.0                                     |
| Cabarrus   | 11757.6                                         | 130.7                                | 72,071                            | 7.9                           | 50435.9                                     |
| Caldwell   | 12167.2                                         | 135.6                                | 48,512                            | 12                            | 44250.3                                     |
| Camden     | 6767.1                                          | 56.9                                 | 69,610                            | 10.4                          | 46912.7                                     |
| Carteret   | 8099                                            | 82.5                                 | 60,058                            | 16.2                          | 54422.6                                     |
| Caswell    | 10068.8                                         | 132.3                                | 51,240                            | 13.3                          | 44695.6                                     |
| Catawba    | 13294                                           | 197.3                                | 53,688                            | 8.7                           | 49942.7                                     |
| Chatham    | 7269.6                                          | 124.8                                | 70,258                            | 17.7                          | 52516.4                                     |
| Cherokee   | 10393.7                                         | 139.4                                | 42,764                            | 18.5                          | 43628.5                                     |
| Chowan     | 11257.7                                         | 262.5                                | 47,126                            | 14                            | 51839.6                                     |
| Clay       | 9117.5                                          | 164.4                                | 47,116                            | 19                            | 43709.4                                     |
| Cleveland  | 13063.1                                         | 237.5                                | 46,012                            | 22.3                          | 46523.1                                     |
| Columbus   | 13052                                           | 287.2                                | 39,531                            | 13.8                          | 41325.6                                     |
| Craven     | 9696.5                                          | 125.9                                | 53,372                            | 18                            | 56300.7                                     |
| Cumberland | 10158.6                                         | 101.8                                | 46,599                            | 8.8                           | 58214.5                                     |
| Currituck  | 6497.7                                          | 60.7                                 | 70,699                            | 8.9                           | 38745.8                                     |
| Dare       | 7034.4                                          | 27.6                                 | 63,033                            | 15.2                          | 68559.0                                     |
| Davidson   | 10904.5                                         | 124.6                                | 53,924                            | 10.9                          | 44467.2                                     |
| Davie      | 10582.9                                         | 101.8                                | 63,828                            | 17.7                          | 53113.5                                     |
| Duplin     | 12027.1                                         | 245.9                                | 44,929                            | 14                            | 39875.0                                     |
| Durham     | 8681.8                                          | 77.3                                 | 65,541                            | 21                            | 65055.3                                     |
| Edgecombe  | 11341.4                                         | 218.4                                | 40,784                            | 15.2                          | 44365.9                                     |
| Forsyth    | 10384.5                                         | 115.9                                | 53,054                            | 11.6                          | 56685.8                                     |
| Franklin   | 11170.5                                         | 82.9                                 | 57,371                            | 11.6                          | 49415.2                                     |
| Gaston     | 13156.8                                         | 204.3                                | 56,542                            | 14.7                          | 46151.3                                     |
| Gates      | 6745.8                                          | 112.6                                | 54,204                            | 16.8                          | 36914.0                                     |
| Graham     | 8755.4                                          | 152.8                                | 45,813                            | 14.6                          | 44508.9                                     |
| Granville  | 10548.1                                         | 141.6                                | 54,300                            | 20.2                          | 58744.6                                     |
| Greene     | 12218.9                                         | 228.2                                | 44,648                            | 16                            | 49152.8                                     |
| Guilford   | 9699.2                                          | 139.8                                | 55,820                            | 23.8                          | 56294.0                                     |
| Halifax    | 11646.8                                         | 226.6                                | 38,727                            | 15.6                          | 49842.0                                     |

|              |         |       |        |      |         |
|--------------|---------|-------|--------|------|---------|
| Harnett      | 10055   | 140.6 | 55,619 | 10.6 | 37325.7 |
| Haywood      | 8011.1  | 163.8 | 51,612 | 10.6 | 54116.9 |
| Henderson    | 9619.5  | 143.6 | 61,651 | 23   | 54387.4 |
| Hertford     | 8987.2  | 266.5 | 42,374 | 16.9 | 43954.0 |
| Hoke         | 10058   | 103.8 | 48,420 | 19.2 | 31142.1 |
| Hyde         | 13005.9 | 172.6 | 43,112 | 8.2  | 62102.5 |
| Iredell      | 11746.2 | 135   | 68,308 | 19.3 | 48711.8 |
| Jackson      | 9071.2  | 130.4 | 47,759 | 12.5 | 49795.2 |
| Johnston     | 12269   | 124.4 | 62,835 | 18.8 | 48801.2 |
| Jones        | 9881.2  | 302.3 | 46,275 | 14.2 | 47839.5 |
| Lee          | 11170.5 | 137.2 | 53,114 | 23.1 | 50806.9 |
| Lenoir       | 11625.2 | 227.3 | 39,947 | 9    | 50605.0 |
| Lincoln      | 13322.6 | 103.7 | 70,479 | 14.3 | 46412.2 |
| Macon        | 9631.5  | 117.8 | 46,279 | 14.6 | 56358.4 |
| Madison      | 8019    | 200   | 50,062 | 20.6 | 53840.5 |
| Martin       | 11037.7 | 201.3 | 39,413 | 13.6 | 48213.0 |
| McDowell     | 12280.3 | 139.3 | 46,370 | 10.3 | 48920.4 |
| Mecklenburg  | 11515.9 | 92.6  | 69,455 | 14.8 | 57884.2 |
| Mitchell     | 10117.3 | 106.6 | 47,675 | 16.1 | 45068.2 |
| Montgomery   | 12945.8 | 355.9 | 46,497 | 11.3 | 41173.2 |
| Moore        | 10101.3 | 202.5 | 63,942 | 16.4 | 53081.9 |
| Nash         | 12889.5 | 214.8 | 50,902 | 13   | 53674.5 |
| New Hanover  | 9231.9  | 78.5  | 57,252 | 13.6 | 59009.4 |
| Northampton  | 9781.4  | 305.8 | 57,388 | 21.6 | 43915.2 |
| Onslow       | 10015.9 | 82.5  | 39,777 | 12.5 | 54333.7 |
| Orange       | 6267.8  | 69.7  | 50,645 | 13.4 | 70639.0 |
| Pamlico      | 9204    | 110.2 | 74,314 | 15.9 | 53819.0 |
| Pasquotank   | 9027.2  | 220.2 | 52,522 | 14.3 | 47963.5 |
| Pender       | 10117.7 | 115.9 | 51,245 | 11.5 | 47275.6 |
| Perquimans   | 8056.6  | 81.9  | 60,405 | 15   | 43014.2 |
| Person       | 9551.4  | 193.2 | 50,804 | 15.4 | 52557.6 |
| Pitt         | 12366   | 53.2  | 54,553 | 19.2 | 49189.5 |
| Polk         | 7758.9  | 155.7 | 52,961 | 12.1 | 42844.0 |
| Randolph     | 11246   | 166.3 | 53,405 | 14.1 | 40723.3 |
| Richmond     | 11927.5 | 237.8 | 50,129 | 25.8 | 44241.5 |
| Robeson      | 14209.3 | 216.4 | 40,518 | 31.5 | 38418.4 |
| Rockingham   | 9393.2  | 196.5 | 36,366 | 18.4 | 47447.5 |
| Rowan        | 13204.9 | 228.8 | 44,686 | 13.9 | 40998.5 |
| Rutherford   | 11973.2 | 336.3 | 52,051 | 18.5 | 39254.7 |
| Sampson      | 13670.4 | 181.4 | 44,547 | 16.8 | 47816.0 |
| Scotland     | 12139.4 | 259.4 | 45,997 | 28.5 | 45943.8 |
| Stanly       | 13699.1 | 228.9 | 39,197 | 10.7 | 40878.3 |
| Stokes       | 9873.1  | 176.9 | 58,303 | 13   | 43918.8 |
| Surry        | 12441.1 | 240.4 | 52,356 | 16   | 48758.1 |
| Swain        | 9095.4  | 133.2 | 48,637 | 16.1 | 51124.7 |
| Transylvania | 7887.5  | 97.7  | 46,075 | 13.1 | 52089.6 |
| Tyrrell      | 8595.8  | 146.5 | 55,628 | 25.4 | 46240.0 |
| Union        | 11579.6 | 99.1  | 37,680 | 12.3 | 50758.6 |
| Vance        | 11542.5 | 202.3 | 65,712 | 18.5 | 52042.2 |
| Wake         | 9047.5  | 70.3  | 40,450 | 8    | 66787.6 |

|            |         |       |        |      |         |
|------------|---------|-------|--------|------|---------|
| Warren     | 9337.6  | 100.5 | 37,027 | 21.7 | 51578.7 |
| Washington | 9805.4  | 268.4 | 40,157 | 21.3 | 46994.8 |
| Watauga    | 9385.5  | 60.1  | 51,630 | 21.4 | 53400.9 |
| Wayne      | 9866.3  | 199.8 | 45,634 | 18.6 | 47511.2 |
| Wilkes     | 10936.3 | 170.9 | 45,250 | 15.2 | 44268.5 |
| Wilson     | 12677.6 | 228.4 | 42,414 | 21.5 | 47942.0 |
| Yadkin     | 11704.2 | 148.9 | 50,929 | 13.9 | 46255.3 |
| Yancey     | 10090.1 | 157.7 | 47,664 | 14.2 | 47174.7 |
